# Supplementary material for: Physicochemical and structural investigation of l-threonine/glycerol-based deep eutectic solvents using experimental and molecular modelling approaches
Source: Royal Society of Chemistry journal article supplement (doi:10.1039/d4nj02664k), 2024-01-01
Supplement: d4nj02664k1.pdf [file d4nj02664k1.pdf]

## Physicochemical and Structural Investigation of L-Threonine/Glycerol-based Deep Eutectic Solvent Using Experimental and Molecular Modelling Approaches.

Md Jaish Uddin<sup>a</sup>, Mahdi Ghasemi<sup>b</sup>, Cladie B. White<sup>c</sup>, Anusha Bhattarai<sup>b</sup>, Hasina Akhter<sup>a</sup>, Abdul Hannan<sup>b</sup>, Carl Jacky Saint-Louis<sup>b</sup> and Mohammad A. Halim<sup>b</sup>

<sup>a</sup>Division of Quantum Chemistry, The Red-Green Research Center, BICCB, 16, Tejkunipara, Tejgaon, Dhaka 1215, Bangladesh

<sup>b</sup>Department of Chemistry and Biochemistry, Kennesaw State University, Kennesaw, GA, 30144 USA

<sup>c</sup>Department of Physical Sciences, University of Arkansas-Fort Smith, Fort Smith 72913-3649, Arkansas, United States

\*Corresponding Author: Mohammad A. Halim, Email: [mhalim1@kennesaw.edu](mailto:mhalim1@kennesaw.edu); Phone: 1-470-578-6759.

### List of Supporting Tables

**Table S1.** IR wavenumbers and intensities of L-threonine, Glycerol, and four cluster conformers (A, B, C, D) of 1:3 Thr: Gly DES clusters

|                                 | Gly               | Intensit<br>y |                      | Thr               | Intensit<br>y |                      | A                 | Intensit<br>y |                      | B                 | Intensit<br>y |                      | C                 | Intensit<br>y |                      | D                 | Intensit<br>y |
|---------------------------------|-------------------|---------------|----------------------|-------------------|---------------|----------------------|-------------------|---------------|----------------------|-------------------|---------------|----------------------|-------------------|---------------|----------------------|-------------------|---------------|
| ν (OH-free)                     | 3410              | 48.21         | ν (OH-free)          | 3306              | 87.71         | ν (OH-free)          | 3380              | 55.27         | ν (OH-free)          | 3386              | 42.54         | ν (OH-free)          | 3363              | 78.2          | ν (OH-free)          | 3409              | 41.58         |
|                                 |                   |               |                      |                   |               | ν (OH-bond.)         | 3200              | 355.86        | ν (OH-bond.)         | 3277              | 244.8         | ν (OH-bond.)         | 3193              | 396.88        | ν (OH-bond.)         | 3257              | 323.26        |
|                                 |                   |               |                      |                   |               |                      |                   |               |                      |                   |               |                      |                   |               | ν (OH-bond.)         | 2912              | 666.17        |
|                                 |                   |               | ν <sub>as</sub> (NH) | 3156              | 9.44          | ν <sub>as</sub> (NH) | N/A               |               | ν <sub>as</sub> (NH) | 3138              | 29.86         | ν <sub>as</sub> (NH) | N/A               |               | ν <sub>as</sub> (NH) | 3137              | 30.94         |
|                                 |                   |               | ν <sub>s</sub> (NH)  | 3077              | 7.29          | ν <sub>s</sub> (NH)  | 3105              | 76.53         | ν <sub>s</sub> (NH)  | 3076              | 17.2          | ν <sub>s</sub> (NH)  | 3080              | 29.32         | ν <sub>s</sub> (NH)  | 3069              | 61.81         |
| ν <sub>as</sub> (CH)            | 2867              | 50.38         | ν <sub>as</sub> (CH) | 3013              | 22.66         | ν <sub>as</sub> (CH) | 2977              | 28.39         | ν <sub>as</sub> (CH) | 2976              | 32.77         | ν <sub>as</sub> (CH) | 2969              | 29.76         | ν <sub>as</sub> (CH) | 2982              | 28.85         |
| ν <sub>s</sub> (CH)             | 2920              | 62.36         | ν <sub>s</sub> (CH)  | 2839              | 50.48         | ν <sub>s</sub> (CH)  | 2887              | 43.39         | ν <sub>s</sub> (CH)  | 2891              | 43.31         | ν <sub>s</sub> (CH)  | 2899              | 37.46         | ν <sub>s</sub> (CH)  | 2899              | 43.92         |
|                                 |                   |               | ν (C=O)              | 1780              | 41.77         | ν (C=O)              | 1754              | 525.27        | ν (C=O)              | 1787              | 290.8         | ν (C=O)              | 1749              | 320.12        | ν (C=O)              | 1732              | 334.11        |
|                                 |                   |               | S (NH <sub>2</sub> ) | 1602              | 33.71         | S (NH <sub>2</sub> ) | 1611              | 45.46         | S (NH <sub>2</sub> ) | 1624              | 32.98         | S (NH <sub>2</sub> ) | 1618              | 31.85         | S (NH <sub>2</sub> ) | 1626              | 20.46         |
| ν(C-C) +<br>ν(C-O) +<br>S (C-C) | 1059              | 66.71         | ν (C-C)              | 1048              | 60.93         | ν (C-C)              | 1440              | 27.21         | ν (C-C)              | 1408              | 29.07         | ν (C-C)              | 1390              | 56.65         | ν (C-C)              | 1417              | 33.38         |
|                                 |                   |               | δ (COOH)             | 1105<br>-<br>1384 | 49.61         | δ (COOH)             | 1157<br>-<br>1418 | 28.07         | δ (COOH)             | 1118<br>-<br>1336 | 29.37         | δ (COOH)             | 1173<br>-<br>1397 | 24.42         | δ (COOH)             | 1214<br>-<br>1446 | 28.76         |
| β (OH)                          | 1033<br>-<br>1397 | 37.51         | β (OH)               | 1048<br>-<br>1287 | 54.78         | β (OH)               | 1013<br>-<br>1474 | 33.15         | β (OH)               | 1023<br>-<br>1441 | 35.79         | β (OH)               | 1017<br>-<br>1463 | 33.69         | β (OH)               | 1024<br>-<br>1446 | 35.07         |

|                   |     |       |              |             |       |            |             |        |            |             |        |            |             |        |            |             |       |
|-------------------|-----|-------|--------------|-------------|-------|------------|-------------|--------|------------|-------------|--------|------------|-------------|--------|------------|-------------|-------|
|                   |     |       | u (C-O)<br>+ | 1107        | 21.08 | u (C-N)    | 1160        | 292.06 | u (C-N)    | 1118        | 202.94 | u (C-N)    | 1132        | 56.657 | u (C-N)    | 1176        | 26.65 |
|                   |     |       | u (C-N)      |             |       | u (C-O)    | 1052        | 130.71 | u (C-O)    | 1076        | 254.07 | u (C-O)    | 1060        | 57.82  | u (C-O)    | 1066        | 54.37 |
|                   |     |       | W<br>(NH2)   | 888         | 56.21 | W<br>(NH2) | 847         | 30.95  | W<br>(NH2) | 872         | 25.27  | W<br>(NH2) | 848         | 57.1   | W<br>(NH2) | 882         | 41.58 |
| $\nu$<br>(OH<br>) | 544 | 55.04 | $\nu$ (OH)   | 535-<br>724 | 58.61 | $\nu$ (OH) | 529-<br>874 | 74.86  | $\nu$ (OH) | 519-<br>860 | 79.91  | $\nu$ (OH) | 523-<br>862 | 77.2   | $\nu$ (OH) | 524-<br>915 | 61.04 |

uas = asymmetric stretching; us = symmetric stretching;  $\beta$  = In-plane bending;  $\gamma$  = out-plane bending;  $\delta$  = deformation; W = wagging; S = scissoring

**Table S2.** Gibbs free energy change  $\Delta G$  and electronic energy change  $\Delta E$  (in kJ/mol) of L-Threonine, Glycerol and the DES's Conformers Calculated using the  $\omega$ B97xD/6-311G(d,p) Level of Theory in the Gas Phase and with Standard Conditions

| Parameter           | Conformer A | Conformer B | Conformer C | Conformer D |
|---------------------|-------------|-------------|-------------|-------------|
| $\Delta G$ (kJ/mol) | -53.9908    | -43.6043    | -50.2074    | -48.0046    |
| $\Delta E$ (kJ/mol) | -241.882    | -231.711    | -241.129    | -224.869    |

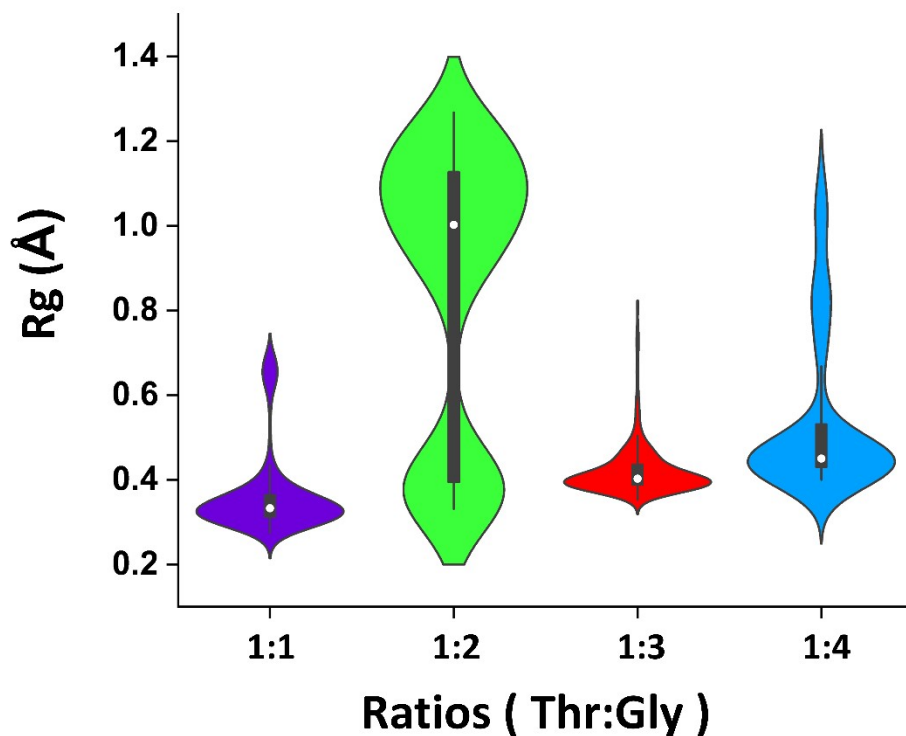

**Figure S1.** The radius of gyration of different pairs of threonine and glycerol

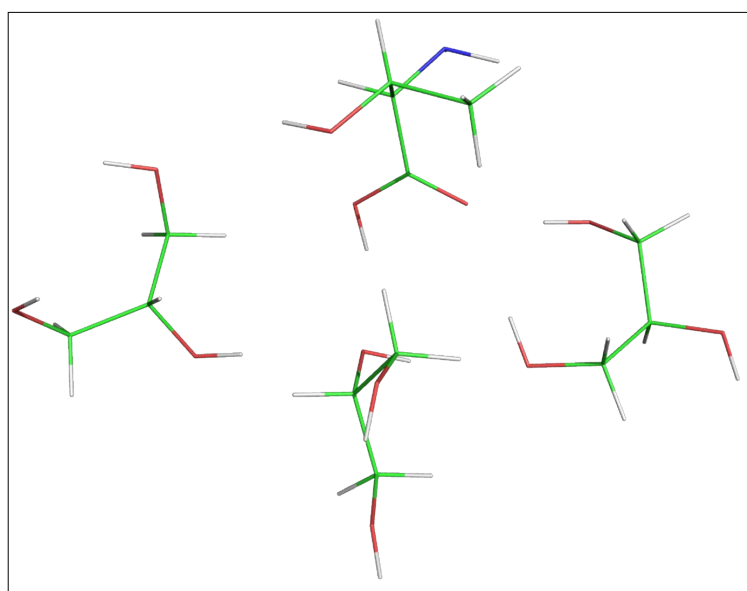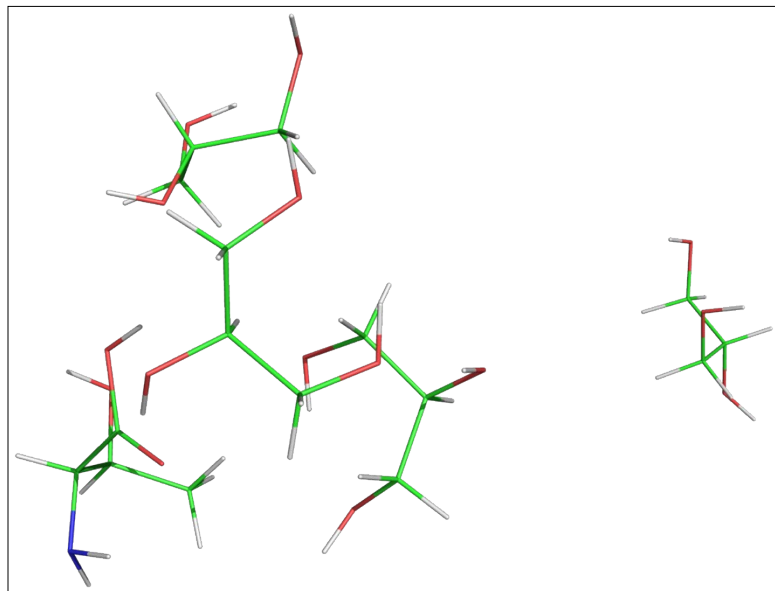

(A)

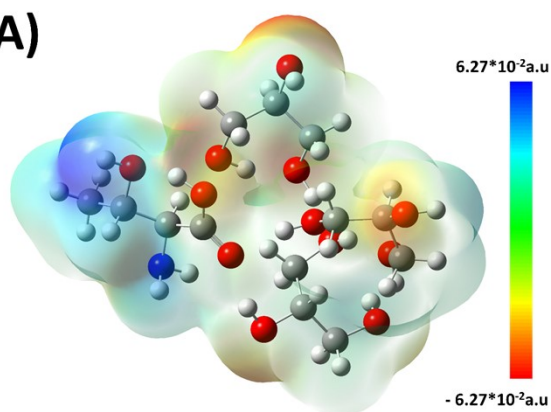

(B)

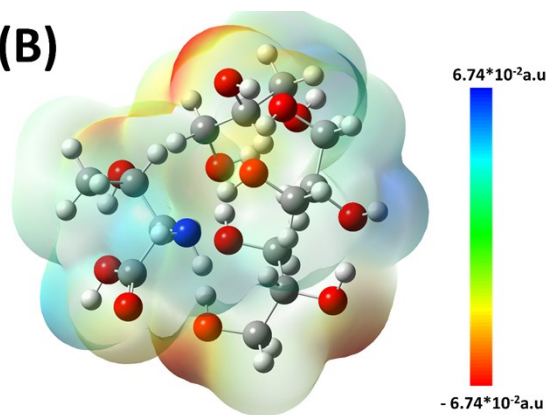

(C)

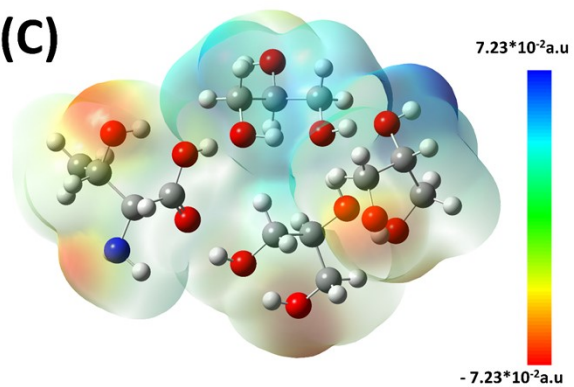

(D)

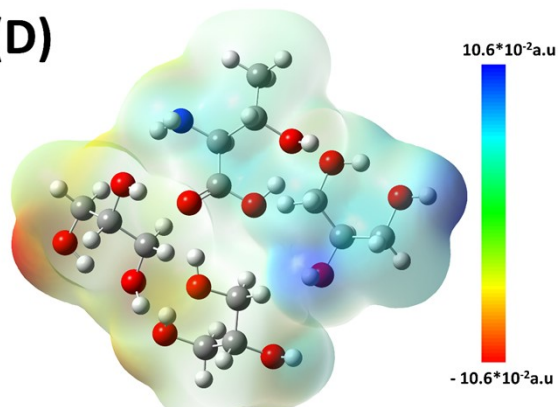

**Figure S2.** Representative conformers of 1:3 (left) and 1:4 pair (right)

**Figure S3.** The surface electrostatic potential is created by mapping the total density onto the electrostatic potential of conformers (A-D). The color code determines the electrostatic potential where: red= the most negative, blue = the most positive, and green = zero-potential region.

### S1.1 The Surface Electrostatic Potential

The surface electrostatic potential gives information regarding the density of electrons in space around the molecule and eventually plays an important role in unveiling the prominent non-covalent interaction sites<sup>1,2</sup>. The surfaces were generated and plotted in Gauss View 5. In clusters A and B, the doubly bonded oxygen atom of Threonine is shown in yellow, indicating a strong negative electrostatic potential, while in clusters C and D, it is light yellow, suggesting a moderate negative potential. Nearby hydrogen atoms of Glycerol are very light blue, representing a very low positive potential. This facilitates bonding between these atom pairs from both molecules, which can endure steric hindrance<sup>3</sup>. The hydrogen atoms attached to the oxygen of Threonine are light blue in clusters A, C, and D. In contrast, the oxygens of Glycerol are red in cluster A and very light yellow in the other two clusters, reflecting strong non-bonding interactions in the first type and moderate interactions in the second. In cluster B, the single-bonded oxygen on Threonine is red, and the corresponding hydrogen atoms (attached to carbon) are mostly very light blue, suggesting that the bonding here would be of moderate to low intensity. The nitrogen atom's surface in cluster B is light blue, with nearby hydrogens (attached to O or C) also very light blue, indicating that any potential non-bonding interactions between these atoms would be very weak. For Glycerol bonding interactions, atoms C-H, O-H, and O exhibit various patterns, allowing for a range of non-bonding interactions from low to strong.

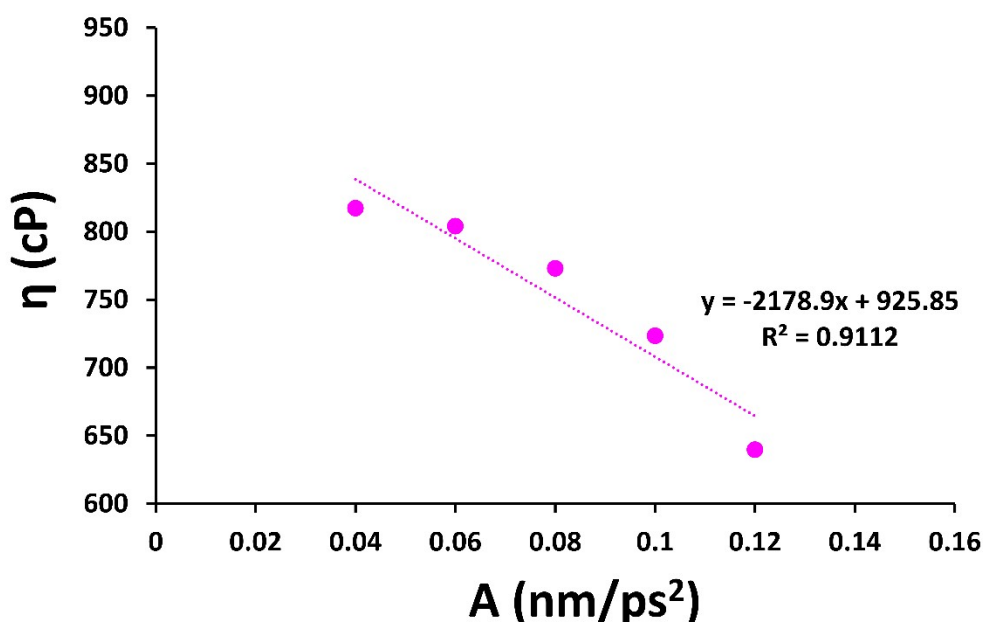

**Figure S4.** Extrapolated Viscosity of glycerol (NEMD)

### Modified Force field Parameters of L-threonine.

;  
; GENERATED BY LigParGen Server  
; Jorgensen Lab @ Yale University  
; Scaled by a factor of 0.8 by The Red-Green Research Center  
; rgrcdhakalab@gmail.com

[ moleculetype ]

; Name nrexcl

THM 3

[ atoms ]

| ; nr | type     | resnr | residue | atom | cgnr | charge   | mass    |
|------|----------|-------|---------|------|------|----------|---------|
| 1    | opls_800 | 1     | THM     | C00  | 1    | 0.36448  | 12.0110 |
| 2    | opls_801 | 1     | THM     | C01  | 1    | 0.07144  | 12.0110 |
| 3    | opls_802 | 1     | THM     | C02  | 1    | 0.152    | 12.0110 |
| 4    | opls_803 | 1     | THM     | C03  | 1    | -0.19712 | 12.0110 |
| 5    | opls_804 | 1     | THM     | O04  | 1    | -0.3972  | 15.9990 |
| 6    | opls_805 | 1     | THM     | O05  | 1    | -0.43264 | 15.9990 |
| 7    | opls_806 | 1     | THM     | O06  | 1    | -0.54768 | 15.9990 |
| 8    | opls_807 | 1     | THM     | N07  | 1    | -0.75336 | 14.0070 |
| 9    | opls_808 | 1     | THM     | H08  | 1    | 0.28984  | 1.0080  |
| 10   | opls_809 | 1     | THM     | H09  | 1    | 0.28984  | 1.0080  |
| 11   | opls_810 | 1     | THM     | H0A  | 1    | 0.35144  | 1.0080  |
| 12   | opls_811 | 1     | THM     | H0B  | 1    | 0.36208  | 1.0080  |
| 13   | opls_812 | 1     | THM     | H0C  | 1    | 0.0808   | 1.0080  |

|    |          |   |     |     |   |         |        |
|----|----------|---|-----|-----|---|---------|--------|
| 14 | opls_813 | 1 | THM | H0D | 1 | 0.0808  | 1.0080 |
| 15 | opls_814 | 1 | THM | H0E | 1 | 0.1208  | 1.0080 |
| 16 | opls_815 | 1 | THM | H0F | 1 | 0.08208 | 1.0080 |
| 17 | opls_816 | 1 | THM | H0G | 1 | 0.0808  | 1.0080 |

[ bonds ]

|    |   |   |        |            |
|----|---|---|--------|------------|
| 2  | 1 | 1 | 0.1522 | 265265.600 |
| 3  | 2 | 1 | 0.1529 | 224262.400 |
| 4  | 3 | 1 | 0.1529 | 224262.400 |
| 5  | 1 | 1 | 0.1229 | 476976.000 |
| 6  | 1 | 1 | 0.1364 | 376560.000 |
| 7  | 3 | 1 | 0.1410 | 267776.000 |
| 8  | 2 | 1 | 0.1448 | 319657.600 |
| 9  | 8 | 1 | 0.1010 | 363171.200 |
| 10 | 8 | 1 | 0.1010 | 363171.200 |
| 11 | 7 | 1 | 0.0945 | 462750.400 |
| 12 | 6 | 1 | 0.0945 | 462750.400 |
| 13 | 4 | 1 | 0.1090 | 284512.000 |
| 14 | 4 | 1 | 0.1090 | 284512.000 |
| 15 | 2 | 1 | 0.1090 | 284512.000 |
| 16 | 3 | 1 | 0.1090 | 284512.000 |
| 17 | 4 | 1 | 0.1090 | 284512.000 |

[ angles ]

|  | ai | aj | ak | funct | c0      | c1      | c2 | c3 |
|--|----|----|----|-------|---------|---------|----|----|
|  | 1  | 2  | 3  | 1     | 111.100 | 527.184 |    |    |
|  | 2  | 3  | 4  | 1     | 112.700 | 488.273 |    |    |
|  | 2  | 1  | 5  | 1     | 120.400 | 669.440 |    |    |
|  | 2  | 1  | 6  | 1     | 108.000 | 585.760 |    |    |
|  | 2  | 3  | 7  | 1     | 109.500 | 418.400 |    |    |
|  | 1  | 2  | 8  | 1     | 111.200 | 669.440 |    |    |

|    |   |    |   |         |         |
|----|---|----|---|---------|---------|
| 2  | 8 | 9  | 1 | 109.500 | 292.880 |
| 2  | 8 | 10 | 1 | 109.500 | 292.880 |
| 3  | 7 | 11 | 1 | 108.500 | 460.240 |
| 1  | 6 | 12 | 1 | 113.000 | 292.880 |
| 3  | 4 | 13 | 1 | 110.700 | 313.800 |
| 3  | 4 | 14 | 1 | 110.700 | 313.800 |
| 1  | 2 | 15 | 1 | 109.500 | 292.880 |
| 2  | 3 | 16 | 1 | 110.700 | 313.800 |
| 3  | 4 | 17 | 1 | 110.700 | 313.800 |
| 14 | 4 | 17 | 1 | 107.800 | 276.144 |
| 13 | 4 | 14 | 1 | 107.800 | 276.144 |
| 9  | 8 | 10 | 1 | 106.400 | 364.845 |
| 3  | 2 | 15 | 1 | 110.700 | 313.800 |
| 7  | 3 | 16 | 1 | 109.500 | 292.880 |
| 4  | 3 | 7  | 1 | 109.500 | 418.400 |
| 13 | 4 | 17 | 1 | 107.800 | 276.144 |
| 3  | 2 | 8  | 1 | 109.470 | 470.282 |
| 5  | 1 | 6  | 1 | 121.000 | 669.440 |
| 8  | 2 | 15 | 1 | 109.500 | 292.880 |
| 4  | 3 | 16 | 1 | 110.700 | 313.800 |

[ dihedrals ]

; IMPROPER DIHEDRAL ANGLES

| ; ai | aj | ak | al | funct | c0      | c1     | c2 | c3 | c4 | c5 |
|------|----|----|----|-------|---------|--------|----|----|----|----|
| 6    | 1  | 2  | 5  | 4     | 180.000 | 43.932 | 2  |    |    |    |

[ dihedrals ]

; PROPER DIHEDRAL ANGLES

| ; ai | aj | ak | al | funct | c0     | c1    | c2    | c3     | c4     | c5    |
|------|----|----|----|-------|--------|-------|-------|--------|--------|-------|
| 4    | 3  | 2  | 1  | 3     | -4.960 | 6.286 | 1.310 | -2.636 | -0.000 | 0.000 |

|    |   |   |    |   |        |         |         |        |        |       |
|----|---|---|----|---|--------|---------|---------|--------|--------|-------|
| 10 | 8 | 2 | 1  | 3 | -1.268 | 3.021   | 1.745   | -3.498 | -0.000 | 0.000 |
| 9  | 8 | 2 | 1  | 3 | -1.268 | 3.021   | 1.745   | -3.498 | -0.000 | 0.000 |
| 9  | 8 | 2 | 3  | 3 | -1.268 | 3.021   | 1.745   | -3.498 | -0.000 | 0.000 |
| 10 | 8 | 2 | 3  | 3 | -1.268 | 3.021   | 1.745   | -3.498 | -0.000 | 0.000 |
| 15 | 2 | 1 | 5  | 3 | 0.000  | 0.000   | 0.000   | -0.000 | -0.000 | 0.000 |
| 15 | 2 | 1 | 6  | 3 | 0.000  | 0.000   | 0.000   | -0.000 | -0.000 | 0.000 |
| 16 | 3 | 2 | 1  | 3 | -0.209 | -0.628  | 0.000   | 0.837  | -0.000 | 0.000 |
| 17 | 4 | 3 | 2  | 3 | 0.628  | 1.883   | 0.000   | -2.510 | -0.000 | 0.000 |
| 13 | 4 | 3 | 2  | 3 | 0.628  | 1.883   | 0.000   | -2.510 | -0.000 | 0.000 |
| 14 | 4 | 3 | 2  | 3 | 0.628  | 1.883   | 0.000   | -2.510 | -0.000 | 0.000 |
| 15 | 2 | 3 | 4  | 3 | 0.628  | 1.883   | 0.000   | -2.510 | -0.000 | 0.000 |
| 16 | 3 | 4 | 14 | 3 | 0.628  | 1.883   | 0.000   | -2.510 | -0.000 | 0.000 |
| 16 | 3 | 2 | 15 | 3 | 0.628  | 1.883   | 0.000   | -2.510 | -0.000 | 0.000 |
| 16 | 3 | 4 | 13 | 3 | 0.628  | 1.883   | 0.000   | -2.510 | -0.000 | 0.000 |
| 17 | 4 | 3 | 16 | 3 | 0.628  | 1.883   | 0.000   | -2.510 | -0.000 | 0.000 |
| 16 | 3 | 2 | 8  | 3 | -4.096 | 5.088   | 2.966   | -3.958 | -0.000 | 0.000 |
| 14 | 4 | 3 | 7  | 3 | 0.979  | 2.937   | 0.000   | -3.916 | -0.000 | 0.000 |
| 13 | 4 | 3 | 7  | 3 | 0.979  | 2.937   | 0.000   | -3.916 | -0.000 | 0.000 |
| 17 | 4 | 3 | 7  | 3 | 0.979  | 2.937   | 0.000   | -3.916 | -0.000 | 0.000 |
| 15 | 2 | 3 | 7  | 3 | 0.979  | 2.937   | 0.000   | -3.916 | -0.000 | 0.000 |
| 15 | 2 | 8 | 9  | 3 | 0.837  | 2.510   | 0.000   | -3.347 | -0.000 | 0.000 |
| 15 | 2 | 8 | 10 | 3 | 0.837  | 2.510   | 0.000   | -3.347 | -0.000 | 0.000 |
| 16 | 3 | 7 | 11 | 3 | 0.736  | 2.209   | 0.000   | -2.946 | -0.000 | 0.000 |
| 12 | 6 | 1 | 2  | 3 | 26.150 | -3.138  | -23.012 | -0.000 | -0.000 | 0.000 |
| 12 | 6 | 1 | 5  | 3 | 23.012 | 0.000   | -23.012 | -0.000 | -0.000 | 0.000 |
| 11 | 7 | 3 | 4  | 3 | -0.444 | 3.833   | 0.728   | -4.117 | -0.000 | 0.000 |
| 11 | 7 | 3 | 2  | 3 | -0.444 | 3.833   | 0.728   | -4.117 | -0.000 | 0.000 |
| 8  | 2 | 1 | 5  | 3 | 0.000  | 0.000   | 0.000   | -0.000 | -0.000 | 0.000 |
| 8  | 2 | 1 | 6  | 3 | 14.435 | -11.004 | -3.431  | -0.000 | -0.000 | 0.000 |
| 8  | 2 | 3 | 4  | 3 | 3.335  | -1.552  | 2.820   | -4.602 | -0.000 | 0.000 |



|   |   |   |   |   |         |         |        |        |        |       |
|---|---|---|---|---|---------|---------|--------|--------|--------|-------|
| 8 | 2 | 3 | 7 | 3 | 16.736  | -16.736 | 0.000  | -0.000 | -0.000 | 0.000 |
| 5 | 1 | 2 | 3 | 3 | 0.000   | 0.000   | 0.000  | -0.000 | -0.000 | 0.000 |
| 6 | 1 | 2 | 3 | 3 | 5.318   | 0.732   | -2.284 | -3.766 | -0.000 | 0.000 |
| 7 | 3 | 2 | 1 | 3 | -12.929 | 12.929  | 0.000  | -0.000 | -0.000 | 0.000 |

[ pairs ]

1 4 1

3 5 1

1 7 1

3 6 1

1 9 1

1 10 1

4 8 1

3 9 1

5 8 1

3 10 1

2 11 1

6 8 1

2 12 1

7 8 1

4 11 1

2 13 1

2 14 1

5 12 1

1 16 1

4 15 1

2 17 1

7 13 1

5 15 1

7 14 1

6 15 1  
 7 15 1  
 9 15 1  
 8 16 1  
 7 17 1  
 10 15 1  
 11 16 1  
 13 16 1  
 14 16 1  
 15 16 1  
 16 17 1

#### DATA AND SOFTWARE AVAILABILITY

| Server/Software              | Function                                                  | Website                                                                                                                                     |
|------------------------------|-----------------------------------------------------------|---------------------------------------------------------------------------------------------------------------------------------------------|
| Gaussian09                   | Optimization, frequency and Gibbs free energy calculation | <a href="https://gaussian.com/glossary/g09/">https://gaussian.com/glossary/g09/</a>                                                         |
| Biovia Discovery Studio 2024 | Visualization of compound models and interactions         | <a href="https://www.3ds.com/products/biovia/discovery-studio/">https://www.3ds.com/products/biovia/discovery-studio/</a>                   |
| Chimera X 1.3                | Visualization of complexes                                | <a href="https://www.cgl.ucsf.edu/chimerax/download.html">https://www.cgl.ucsf.edu/chimerax/download.html</a>                               |
| Origin Pro (2021)            | Plotting data, PCA                                        | <a href="https://www.originlab.com/2021">https://www.originlab.com/2021</a>                                                                 |
| Microsoft Excel              | Plotting data                                             | <a href="https://www.microsoft.com/en-us/microsoft-365/microsoft-office">https://www.microsoft.com/en-us/microsoft-365/microsoft-office</a> |
| GROMACS 2022.4               | Molecular Dynamics Simulation And data analysis           | <a href="https://manual.gromacs.org/documentation/2022.4/index.html">https://manual.gromacs.org/documentation/2022.4/index.html</a>         |
| LigParGen server             | Forcefield parameters of L-threonine                      | <a href="https://zarbi.chem.yale.edu/ligpargen">https://zarbi.chem.yale.edu/ligpargen</a>                                                   |
| Peer Reviewed Article        | Forcefield parameters of Glycerol                         | <a href="https://pubs.acs.org/doi/10.1021/acs.jpcb.8b06647">https://pubs.acs.org/doi/10.1021/acs.jpcb.8b06647</a>                           |

|             |                                 |                                                                                         |
|-------------|---------------------------------|-----------------------------------------------------------------------------------------|
| Travis code | Analyzing RDF, CDF, SDF and MSD | <a href="http://www.travis-analyzer.de">http://www.travis-analyzer.de</a>               |
| VMD 1.9.3   | Analyzing interactions and SDF  | <a href="https://www.ks.uiuc.edu/Research/vmd">https://www.ks.uiuc.edu/Research/vmd</a> |

## REFERENCES:

- 1 G. Li, J. H. Stenlid, M. S. G. Ahlquist and T. Brinck, *J. Phys. Chem. C*, 2020, **124**, 14696–14705.
- 2 A. Oliver, C. A. Hunter, R. Prohens and J. L. Rosselló, *J. Comput. Chem.*, 2018, **39**, 2371–2377.
- 3 M. K. Chaudhary, A. Srivastava, K. K. Singh, P. Tandon and B. D. Joshi, *Comput. Theor. Chem.*, 2020, **1191**, 113031.
